# Supplementary material
Source: PubMed Central journal article supplement (PMC381014)
Supplement: 7600110s1.pdf [file 7600110s1.pdf]

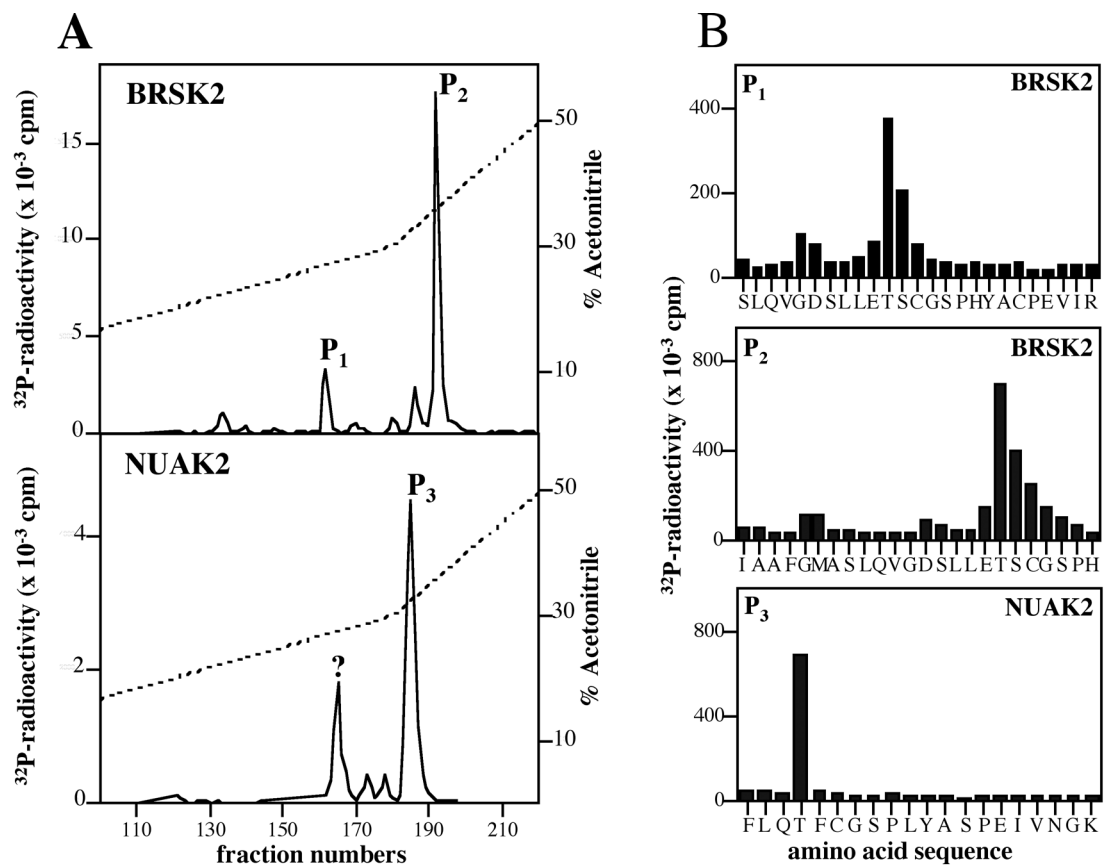

| Kinase               | Posphopeptide                       | Mass observed | Theoretical mass |
|----------------------|-------------------------------------|---------------|------------------|
| BRSK2 P <sub>1</sub> | IAAFGmASLQVGDSLLET(p)SCGSPHYACPEVIR | 3268.7870     | 3628.6680        |
| BRSK2 P <sub>2</sub> | SLQVGDSLLET(p)SCGSPHYACPEVIR        | 2951.4530     | 2951.3472        |
| NUAK2 P <sub>3</sub> | FLQT(p)FCGSPLYASPEIVNGK             | 2356.1088     | 2356.1333        |
| MARK4                | LDT(p)FCGSPPYAAPELFQ GK             | 2225.9983     | 2226.1497        |
| MELK                 | GNKDYHLQT(p)CCGSLAYAAPELIQCK        | 2970.4421     | 2970.3648        |

Supplementary Figure 1
