# Supplementary material
Source: PubMed Central journal article supplement (PMC381014)
Supplement: 7600110s3.pdf [file 7600110s3.pdf]

**Supplementary Table.** Tissue distributions of ESTs encoding the indicated AMPK-related kinases. Abbreviation No., number

**BRSK1**

| Tissue                                 | No |
|----------------------------------------|----|
| Brain                                  | 8  |
| Nervous system                         | 6  |
| Islets of Langerhans                   | 3  |
| Lung tumour                            | 3  |
| Heart                                  | 2  |
| Other (epidermis, fetal eye, prostate) |    |
| 1 per tissue type.                     |    |

**BRSK2**

| Tissue            | No |
|-------------------|----|
| Eye               | 14 |
| Nervous system    | 13 |
| Breast            | 10 |
| Brain             | 8  |
| Pooled germ cells | 3  |
| Var. tumour cells | 7  |

**NUAK1**

| Tissue                                                                          | No |
|---------------------------------------------------------------------------------|----|
| Brain                                                                           | 18 |
| Blood/plasma                                                                    | 7  |
| Liver/spleen                                                                    | 5  |
| Eye                                                                             | 4  |
| Uterus                                                                          | 4  |
| Prostate                                                                        | 3  |
| Var. tumour cells                                                               | 9  |
| Other (lung, head/neck, breast, adipose tissue, placenta, embryonic stem cells) |    |
| less than 3 per tissue type.                                                    |    |

**NUAK2**

| Tissue                                            | No |
|---------------------------------------------------|----|
| Blood                                             | 18 |
| Placenta                                          | 6  |
| Brain                                             | 6  |
| Ovary                                             | 6  |
| Nervous system                                    | 3  |
| Kidney                                            | 2  |
| Colon                                             | 2  |
| Eye                                               | 2  |
| Var. tumour cells                                 | 10 |
| Other (including muscle, head/neck, cervix, lung) |    |
| 1 per tissue type.                                |    |

**MELK**

| Tissue                                                                         | No. |
|--------------------------------------------------------------------------------|-----|
| Blood                                                                          | 7   |
| Adenocarcinoma                                                                 | 7   |
| Stomach                                                                        | 5   |
| Germinal B cell                                                                | 5   |
| Germ cell tumour                                                               | 4   |
| Ascites                                                                        | 4   |
| Other (cervix, eye, nervous system, intestine, heart, brain, uterus, placenta) |     |
| less than 3 per tissue type.                                                   |     |

**QIK**

| Tissue                                                          | No. |
|-----------------------------------------------------------------|-----|
| Eye                                                             | 17  |
| Liver/spleen                                                    | 17  |
| Blood                                                           | 14  |
| Brain                                                           | 13  |
| Breast                                                          | 10  |
| Intestine                                                       | 11  |
| Intestinal tumour                                               | 10  |
| Melanocyte                                                      | 9   |
| Nervous system                                                  | 9   |
| Insulinoma                                                      | 7   |
| Lung                                                            | 7   |
| Placenta                                                        | 7   |
| Heart                                                           | 6   |
| Fibroblast                                                      | 6   |
| Kidney                                                          | 5   |
| Germ cell tumour                                                | 5   |
| Other (prostate, uterus, testis, head, pancreas, bone, stomach) |     |
| less than 5 per tissue type.                                    |     |

**SIK**

| Tissue                                                                                        | No. |
|-----------------------------------------------------------------------------------------------|-----|
| Uterus                                                                                        | 12  |
| Adenocarcinoma                                                                                | 12  |
| Intestine tumour                                                                              | 12  |
| Brain tumour                                                                                  | 11  |
| Breast                                                                                        | 9   |
| Kidney                                                                                        | 8   |
| Melanocyte                                                                                    | 7   |
| Blood/plasma                                                                                  | 7   |
| Stomach                                                                                       | 6   |
| Brain                                                                                         | 5   |
| Fetal heart                                                                                   | 5   |
| Heart                                                                                         | 5   |
| Head/neck                                                                                     | 5   |
| Other (placenta, cervical tumour, thymus, liver, lung, prostate, marrow, eye, bladder tumour) |     |
| less than 5 per tissue type.                                                                  |     |

**QSK**

| Tissue                                                 | No |
|--------------------------------------------------------|----|
| Liver/spleen                                           | 25 |
| Lung carcinoma                                         | 23 |
| Brain                                                  | 14 |
| Head/neck                                              | 13 |
| Nervous syst. tumour                                   | 11 |
| Adenocarcinoma                                         | 10 |
| Placenta                                               | 10 |
| Melanocyte                                             | 9  |
| Pancreas                                               | 8  |
| Eye                                                    | 7  |
| Carcinoid                                              | 7  |
| Blood                                                  | 6  |
| Kidney                                                 | 6  |
| Other (breast, intestine, testis, lung, uterus, heart) |    |
| less than 6 per tissue type.                           |    |

**MARK1**

| Tissue                                                     | No |
|------------------------------------------------------------|----|
| Brain                                                      | 17 |
| Carcinoid                                                  | 12 |
| Breast                                                     | 7  |
| Lung tumour                                                | 6  |
| Pancreas                                                   | 5  |
| Eye                                                        | 4  |
| Other (heart, head/neck, kidney, nervous system, placenta) |    |
| less than 3 per tissue type.                               |    |

**MARK2**

| Tissue                                                               | No |
|----------------------------------------------------------------------|----|
| Head/neck                                                            | 18 |
| Brain                                                                | 17 |
| Intestine                                                            | 13 |
| Adenocarcinoma                                                       | 11 |
| Pancreas                                                             | 9  |
| Placenta                                                             | 8  |
| Eye                                                                  | 8  |
| Blood                                                                | 7  |
| Melanoma                                                             | 6  |
| Other (prostate, kidney, lung, bone, uterus, thymus, nervous system) |    |
| less than 6 per tissue type.                                         |    |

**MARK3**

| Tissue                                                    | No  |
|-----------------------------------------------------------|-----|
| Brain                                                     | 29  |
| Nervous system                                            | 26  |
| Liver/spleen                                              | 23  |
| Eye                                                       | 21  |
| Placenta                                                  | 19  |
| Lung                                                      | 17  |
| Colon                                                     | 8   |
| Stomach                                                   | 7   |
| Heart                                                     | 6   |
| Uterus                                                    | 6   |
| Kidney                                                    | 6   |
| Skeletal muscle                                           | 5   |
| Cervix                                                    | 5   |
| Blood                                                     | 5   |
| Var. tumour cells                                         | 102 |
| Other (prostate, testis, pancreas, lymph, marrow, breast) |     |
| less than 5 per tissue type.                              |     |

**MARK4**

| Tissue            | No |
|-------------------|----|
| Brain             | 13 |
| Eye               | 13 |
| Nervous tissue    | 11 |
| Liver/spleen      | 7  |
| Colon             | 4  |
| Stomach           | 3  |
| Breast            | 3  |
| Prostate          | 3  |
| Testis            | 2  |
| Lung              | 2  |
| Var. tumour cells | 43 |
