# Supplementary material
Source: PubMed Central journal article supplement (PMC381014)

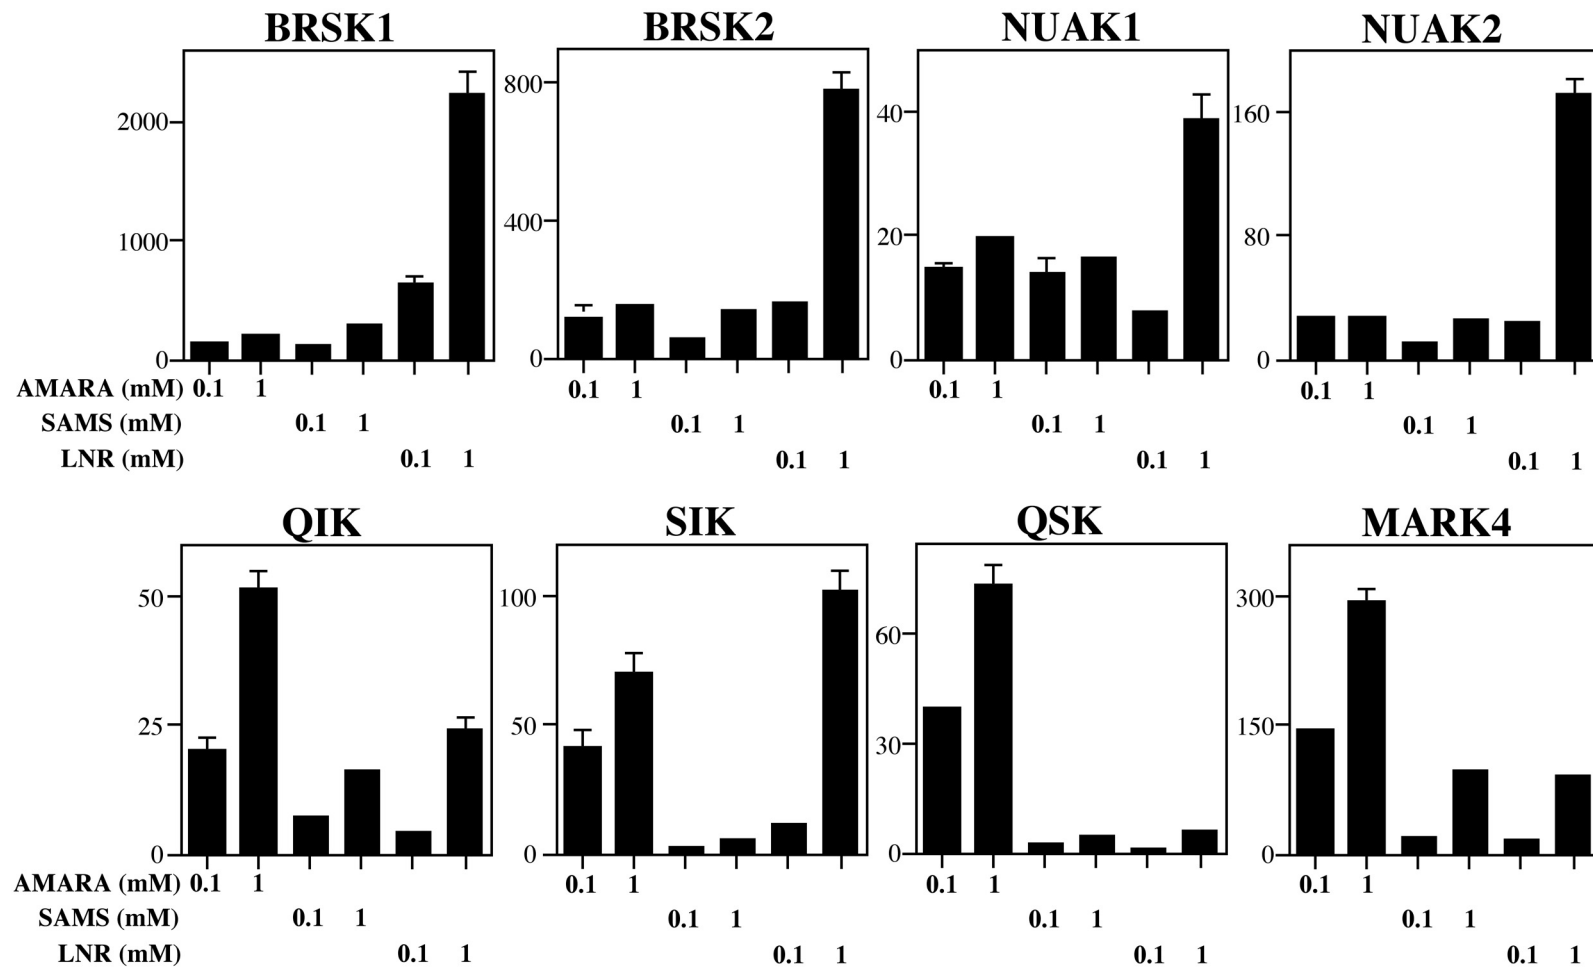

Supplementary Figure 2

Supplement: 7600110s2.pdf [file 7600110s2.pdf]
